# Supplementary material for: Transit Peptides Often Require Downstream Unstructured Sequence for Efficient Chloroplast Import in Chlamydomonas reinhardtii
Source: Front Plant Sci. 2022 May 12;13:825797. doi: 10.3389/fpls.2022.825797 (PMC9133816; doi:10.3389/fpls.2022.825797)
Supplement: Supplementary file 1 [file Table_1.XLSX]

## Sheet: Sheet1
Name	Identifier	Description	Peptide.sequence	Preprotein.sequence	Peptide.length	Preprotein.length
LEU1	Cre01.g004500.t1.2	Isopropylmalate dehydratase, large subunit	MSLQATMNAPCATGRVARRSVKVSAISAPPTPARAPSSTGSVKRAMTMTEKI	MSLQATMNAPCATGRVARRSVKVSAISAPPTPARAPSSTGSVKRAMTMTEKILANHSDNSAVKPGDNIWTKVDKLMTHDVCGPGTFGIFQKEFGPNAKVWDNERVVIIPDHYIFTSDARANRNVDILREVAGKYNIKYFYDITDRSNFKANPDYKGVCHVALAQEGHCKPGEVLFGTDSHTCNAGAFGQFATGVGNTDAGFILGTGKLLIKVPPTMRFIMDGEMPEYLLAKDLILQIIGEISVAGATYKAMEFAGSAIEGMNMDERMTICNMVVEAGGKNGVIAPDQTTFDYVKARTQEAFEPVYSDGAASYIADYKWDVSKLEPLVAAPHSPDNRKTARECSDVKIDRVYIGSCTGGKTEDFISAAKLFYRAKRQVKVPTYLVPATQKVWADVYTMPV…	52	487
FBA1	Cre01.g006950.t1.1	Fructose-1,6-bisphosphate aldolase	MQAKMQTRAVSGRAAARSRVSTTKVVC	MQAKMQTRAVSGRAAARSRVSTTKVVCRALNSMESPYAEELKKTAAYISQKGKGILASDESNATTGKRLESVGVENTEDNRRAWRELLYTAPGLGQYISGAIMFEETLYQKARDGRQFVDILLAQGIYPGIKVDTGLQILPGDKGETTTQGLDGLADRCKAYRKQGARFAKWRAVVKIGEAGCPSTTAVLENAHGLARYAQICQENGLVPIVEPEVTLGP GDYSIEETAFWSERVYSHTMRLLNEYGVVLEGILLKPNMCLPGLDAPVASPQLVAEVTTRTMMRSIPPAVPGIHFLSGGMSEEESTLNLQALNEACPNAPWALTFSYGRALQSSTLKTWAGKESNWAAAQDILLKLAKANSEASTGSFKGPHPVPGGGRILQALRTGGAGK	27	392
Cre01.g024350	Cre01.g024350.t1.2	TRANSMEMBRANE 9 SUPERFAMILY PROTEIN	MRLLVACALLALLQLSAAVRLPAAIEQAVGRQLL	MRLLVACALLALLQLSAAVRLPAAIEQAVGRQLLSEKDHSYQPDDKVPLWASKVGPFTNPSETYEYYSLPYCQPKDGVKHKLLGMGEVVDANRMASTPYQLQFRKNRQREAVCEQLLDQEKLAKFRKAVEEDWYFQMYYDDLPVWGFIGKMEKLFKPGGVTEYKYYLFTHIDFDIKYNDDSVIEINVSTDPQEAVDISEEITDIVKAKFTYSVKWTPTLTKFEHRLDRYERFPLNPVHLEIHWFSIINSCVTVLLLTGFLATILMRVLKADFIKYNKDDPAMEEEESGWKYVHGDVFRFPPYKNLFCAFVGTGTQLFYLALFVFVLALVGVFYPYNRGALYSALIALYALTAGIAGFVASSYYKQMEGELWVRNILLTCFVYCGPFLLMFSFLNTVAIV…	34	605
TIC21	Cre01.g039150.t1.2	21 kDa translocon at the inner membrane of chloroplasts	MQALASHRTLATPARPRALGCASLPFRPIGAQAMRRPAREGAVTVHARSGGYSAPGGGRGYSSTPGIVDRVLAALPY	MQALASHRTLATPARPRALGCASLPFRPIGAQAMRRPAREGAVTVHARSGGYSAPGGGRGYSSTPGIVDRVLAALPYILPYFDAVQYGRYLFHMYPAAKACITPFLPAMSLYHSLPFGSFIVFFGLYLGVVNNPSLSRFVRFNAVQAILLDIILVLPRLLETVLTPPTSGWGAQVYIQSQSFIWIFITMWVVFGIVSSMLGQWARIPFIHEAAEAQLR	77	218
Cre01.g054400	Cre01.g054400.t1.1		MNLLARPHIAAGLYPSTRRKCYVQTGAQQLKNRLNTSIRAQ	MNLLARPHIAAGLYPSTRRKCYVQTGAQQLKNRLNTSIRAQSNNSSSEPTQEYVTGGEVVRMPLGAVQQMPESQQAAVVAGIFAALAASTYLCCTVAGPAIADNLPWLYQDFVARRTVVLGGIFAAAGVAHFTSKDAFESMVPRPGAWGFWNLPGSAAFHVEWTGVAEILGGGALVATSTVPALAAAYPWLQPAAAAGLFALTAVVTPSNIYMFTHNAPGPVPKVIPLPGHFMRLVVMQGFLLSQFWDMAHL	41	252
Cre01.g054500	Cre01.g054500.t1.2	NAD(P)(+) transhydrogenase (Re/Si-specific) / Transhydrogenase	MLSMLGRKGQAMCLRSSRQVPSTRASIARLLAQTPRPNVRAN	MLSMLGRKGQAMCLRSSRQVPSTRASIARLLAQTPRPNVRANALAGTAPGTSTSGPAEPIKDPIPYANLVVGVPRENAPGERRVALSPAAVAGLLKQGFKTIVVEKGAGEYSQFTDAEYASAGATLVDSTEAMGADIVLRVRPPALEEVNKIKEGAVLVSYLYPARNKELVEALAKRRATAIGMDCIPRTISRAQMFDSLSSMANIAGYRAVTEATQHFERFLNGQITAAGRIPPAKVLVIGGGVAGLAAVGAAKSLGAIVRVFDTRTAVKEQAKSMGAEFLTVDIQEEGESGTGYSKEMSPAFIEAEMKLFAAQAKEVDIIITTALIPGKGAPLLITKDMVDSMKPGSVIVDLSAEAGGNCGYTKPGEVVKTPNRVTVVGYTDMPSRMAGQSSTLYAN…	42	1094
PSRP3	Cre02.g083950.t1.1	Plastid-specific ribosomal protein 3	MMLVRQVPCLAQRASARSAVRSRPAPFTPARRVFARAQADAALLEDDEVAYEVTNEDFELDENDPDLLLGLEAVELMGSDVDAM	MMLVRQVPCLAQRASARSAVRSRPAPFTPARRVFARAQADAALLEDDEVAYEVTNEDFELDENDPDLLLGLEAVELMGSDVDAMTAAAVAAEMESAEDKEEAARAVEDVMASKLAAGELSEAELSKVAAAVGDLEGAELDDFVPALASDRYAEAAVSSDDKALMEPLKLSKGELRNLLPQDWDQINVDFFSNKKDENIPLPEYRLNVLWTDKNLAVAIDQVYSRGQVSPLTEYYFWPRQDAWEELRINLESRPWISERDRIILLNRLTQLINFWQDEEVKHTVEEARAEFPDCAFAIA	84	298
PRPL1	Cre02.g088900.t1.2	Chloroplast ribosomal protein L1	MAMMSLQQRLLQPSAGVRSVAPFRPVVAPRPVVVVRAAAL	MAMMSLQQRLLQPSAGVRSVAPFRPVVAPRPVVVVRAAALDEEVEFEVVANKPQQNVRKEKPRSKRFKAMQTKTPGRTSELDPKEAIRLVKQTASTKFTESVEFHARMGLDPKFSDQQLRATVSLPFGTGKELRVAVLTQNDNIKLAKDAGADVVGGDDLIEKISGGFMEFDKLIATPDMMPKVAKLGRVLGPRGLMPNPKAGTVTTDVAGTVKDFKGGKVEYRLDKTGNLHVLFGRADFKEEDLLFNLKAVQESIDANKPPGAKGVYWKSMYVCTTMGPSLRIGVSALQNTKGKAE	40	297
Cre02.g098250	Cre02.g098250.t1.2	Pyridoxamine 5'-phosphate oxidase-like protein	MAVNMVLSSSKVMSCGKVGQRRVSTASPLAVVRRGAARVNAARPLSRPPA	MAVNMVLSSSKVMSCGKVGQRRVSTASPLAVVRRGAARVNAARPLSRPPAATPTPAVPSQFVAGGDGDPVMAAFQQQQAHAPRPSAAEEARTVLDQGTHGVLCTLSSADDTKGFPASSVVEFACDGSGRPFFSTSTLSAHTQDMVADGRVSLTVKSPNFQGMDCGRLTLQGVVEPVPEADKARLREIFLKKYPSAFYVDFGDFKWFRMTTIKAARFNGGFGRAPKLTVDEYLAAKPDPVYPFSRPVCGHMNADHLEDGKAMIKHYCGIDVDAFTMLDLDRLGINCSVKRNGETFKLRLPFPHPVEDRKAIKDAIVEMTKKAKGAAAMNARTPGGTI	50	336
RBCS2	Cre02.g120150.t1.2	ribulose-1,5-bisphosphate carboxylase/oxygenase small subunit 2	MAAVIAKSSVSAAVARPARSSVRPMAALKPAVKAAPVAAPAQANQ	MAAVIAKSSVSAAVARPARSSVRPMAALKPAVKAAPVAAPAQANQMMVWTPVNNKMFETFSYLPPLSDEQIAAQVDYIVANGWIPCLEFAESDKAYVSNESAIRFGSVSCLYYDNRYWTMWKLPMFGCRDPMQVLREIVACTKAFPDAYVRLVAFDNQKQVQIMGFLVQRPKSARDWQPANKRSV	45	185
ANR1	Cre03.g164000.t1.2	Anaerobiosis-Related protein 1	MQVMQTRTVSGARPIGASSSRVTLAAVKQVKVSSTTTS	MQVMQTRTVSGARPIGASSSRVTLAAVKQVKVSSTTTSASPQEEIYIGFVKEEGFGSREGRKGRVIKDDPKKYPSRDWVGVGGWAGGEAGLWQLREQVIKEKDSKKPAAPAPSSPLPVKVPKAPAGKAPVYIGFVKEEGFGNRDGKRGRIVVDDPRKYGGKEDLGPLPGVTGGFAAGEVGLKQYVATGDVKLRQPGQPGPRQFSPLTLAGVVALAGALGGVLLGLVNDAAGGN	38	233
PGP1	Cre03.g168700.t1.2	Phosphoglycolate phosphatase/4-nitrophenylphosphatase	MLSLKQLPSARCAARPVRPVRRMVAAQASARPIATNEQKLELLKKVECFI	MLSLKQLPSARCAARPVRPVRRMVAAQASARPIATNEQKLELLKKVECFIFDCDGVIWLGDKVIEGVPETLDMLRGMGKKVFFVTNNSTKSRAGYMSKFQSLGLNVKAEEIYSSSYAAAAYLESINFNKKVYVIGETGILEELDLKGIRHVGGPGDADKKVTLKSGEFMEHDHDVGAVVVGFDRYVNYYKIQYATLCIRENPGCMFIATNRDAVTHLTDAQEWAGNGSMVGAIVGSTKREPIVVGKPSDFMLKNISASLGLRPDQIAMVGDRLDTDIMFGKNGGLATALVLSGVTTPEVLNSPDNKVHPDFVLNSLPDLLSVKEKAMVAA	50	330
SEBP1	Cre03.g185550.t1.2	Sedoheptulose-1,7-bisphosphatase	MAAMMMRQKVAGAIAGERRSAVAPKMGRAATAPVVVASANASAFKGAAVTARVKRSTRAARVQSRRTAVLTQA	MAAMMMRQKVAGAIAGERRSAVAPKMGRAATAPVVVASANASAFKGAAVTARVKRSTRAARVQSRRTAVLTQAKIGDSLAEFLVEATPDPKLRQLMMSMAEATRTIAHKVRTASCAGTACVNSFGDEQLAVDMVADKLLFEALKYSHVCKLACSEEVPEPVDMGGEGFCVAFDPLDGSSIVDTNFAVGTIFGVWPGDKLTNITGREQVAAGMGIYGPRTVFCIALKDAPGCHEFLLMDDGKWMHVKETTHIGEGKMFAPGNLRATFDNPAYERLINFYLGEKYTLRYTGGMVPDVFQIIVKEKGVFTNVTSPTTKAKLRILFEVAPLALLIEKAGGASSCDGKAVSALDIPILVCDQRTQICYGSIGEVRRFEEYMYGTSPRFSEKVAA	73	389
RPI1	Cre03.g187450.t1.2	Ribose-5-phosphate isomerase	MMLKASPAARAAARPAARNVRMM	MMLKASPAARAAARPAARNVRMMAAPVSTQLSQDELKKQAAWKAVEYVKSGMVVGLGTGSTAAFAVDRIGQLLKEGKLQNIVGVPTSIRTYEQALSLGIPLATLDEQPKLDVAIDGADEVDPNLDVVKGRGGALLREKMVEMASAKFVCIVDDSKLVEGLGGSKLAMPVEIVQFCHKYTLQRLANLPEVKGCEAKLRMNGDKPYVTDNSNYIVDLYFQTPIKDSQAASKAILGLDGVVDHGLFLDMVDVCIIAGATGVTVQERPNPKKH	23	269
Cre03.g199535	Cre03.g199535.t1.1	low molecular mass early light-induced protein	MQMLASSSRSAIRASRPTGSSRSSVVVRATAEAPVVEKKERKLGPLERGGTLSGDAAAGKASPKMNFFVDAGDKARAMATGVT	MQMLASSSRSAIRASRPTGSSRSSVVVRATAEAPVVEKKERKLGPLERGGTLSGDAAAGKASPKMNFFVDAGDKARAMATGVTAKPVTILQIVDGRFRDDRWIDGRWDLSQFKSAKTGEVDWDLVIDAEVARRKLLEDNPIPSINEEPVNFDTSEIPWWAWVKRFHLPEAEKLNGRAAMMGYVLALFVDSLSGAGLIEQQESFLGKLALHVCVFAILLVRTTTDLDKYKGLIDEATFYDKQWNATWDGVRRPSEAADQ	83	258
AAD1	Cre03.g206600.t1.2	Acetohydroxyacid dehydratase	MSSTATMPGQRSAMKAAGAQSRRAVKVMA	MSSTATMPGQRSAMKAAGAQSRRAVKVMAVSAPEKPSSSAPAVPAGLNKFSSRITQPKYQGASQAMLFATGLREEDMIKPQVGISSVWYEGNPCNMHLMDLAAEVKKGVEAMGMVGFRFNTIGVSDGISMGTDGMSFSLQSRDLIADSIETVMSAQWYDANISLPGCDKNMPGTLMAMARLNRPSLMIYGGTIKPGHSRMDGSVLDIVSAFQSYGAYSAGLINEAQRVDIVRNSCPGAGACGGMYTANTMASAIEALGMTLPYSSSIPAEDPLKKDECRMAGRYMLELLKSDLKPLDIMTYKAFENAMVLVMATGGSTNAVLHFIAMARACGVPLTLDDFQRVSDRTPFICDLKPSGRYVMEDIHKVGGTPAVLKYLDSKGYINRDCMTVTGKTMGGNL…	29	604
ISA3	Cre03.g207713.t1.1	Isoamylase, starch debranching enzyme	MQLRQAGLRARSTASGAVPCIPVGLHAGAIGMQSALAGGRAAGRGRVATRLPAPKRQSERVRVVAQ	MQLRQAGLRARSTASGAVPCIPVGLHAGAIGMQSALAGGRAAGRGRVATRLPAPKRQSERVRVVAQSVSTLSTSQQLYSSVAVGKPEPLGPSRSGSGVNFALFSKHARSVRLCLFDGEAQPLGEVDCNRTGDVWHVELADLPLSGLRYGFKVAGDGGWDTGARWAPGRVLLDPYAPLVAGRRQFGVRDAVEQFKGKEGSQFLGAFDFSSAPYDWGAQEEAGRPRTALKDLVIYEVPVRCFTADGSSGLPAEERGTFRGMAAKASYLAGLGVNAVELLPVFEWDELEFRRTRNPRDHMTNVLHAQGIQVLLDVVYNHTAEADDKDPYTLCMRGVDNKTYYMIDPSQYVQLVNWSGCGNTVNANNPPVTQMIIDSLVHWVTEYHVDGFRFDLASCLCRDER…	66	725
RCA1	Cre04.g229300.t1.1	rubisco activase	MQVTMKSSAVSGQRVGGARVATRSVRRAQLQVV	MQVTMKSSAVSGQRVGGARVATRSVRRAQLQVVASSRKQMGRWRSIDAGVDASDDQQDITRGREMVDDLFQGGFGAGGTHNAVLSSQEYLSQSRASFNNIEDGFYISPAFLDKMTIHIAKNFMDLPKIKVPLILGIWGGKGQGKTFQCALAYKKLGIAPIVMSAGELESGNAGEPAKLIRTRYREASDIIKKGRMCSLFINDLDAGAGRMGDTTQYTVNNQMVNATLMNIADNPTNVQLPGVYKNEEIPRVPIVCTGNDFSTLYAPLIRDGRMEKYYWNPTREDRIGVCMGIFQEDNVQRREVENLVDTFPGQSIDFFGALRARVYDDMVRQWITDTGVDKIGQQLVNARQKVAMPKVSMDLNVLIKYGKSLVDEQENVKRVQLADAYLSGAELAGHGG…	33	408
LHCBM3	Cre04.g232104.t1.1	Light-harvesting complex II chlorophyll a/b binding protein M3	MAFALSFSRKALQVSAKATGKKGTGKTAAKQ	MAFALSFSRKALQVSAKATGKKGTGKTAAKQAPASSGIEFYGPNRAKWLGPYSENATPAYLTGEFPGDYGWDTAGLSADPETFKRYRELELIHARWAMLGALGCITPELLAKSGTQFGEAVWFKAGAQIFSEGGLDYLGNPSLVHAQNIVATLAVQVILMGLVEGYRVNGGPAGEGLDPLYPGESFDPLGLADDPDTFAELKVKEIKNGRLAMFSMFGFFVQAIVTGKGPIQNLDDHLSNPTVNNAFAFATKFTPSA	31	257
FBA3	Cre05.g234550.t1.2	Fructose-1,6-bisphosphate aldolase	MALMMKSSASLKAVSAGRSRRAVVVRA	MALMMKSSASLKAVSAGRSRRAVVVRAGKYDEELIKTAGTVASKGRGILAMDESNATCGKRLDSIGVENTEENRRAYRELLVTAPGLGQYISGAILFEETLYQSTASGKKFVDVMKEQNIVPGIKVDKGLVPLSNTNGESWCMGLDGLDKRCAEYYKAGARFAKWRSVVSIPHGPSIIAARDCAYGLARYAAIAQNAGLVPIVEPEVLLDGEHDIDRCLEVQEAIWAETFKYMADNKVMFEGILLKPAMVTPGADCKNKAGPAKVAEYTLKMLRRRVPPAVPGIMFLSGGQSELESTLNLNAMNQSPNPWHVSFSYARALQNTVLKTWQGKPENVQAAQAALLKRAKANSDAQQGKYDATTEGKEAAQGMYEKGYVY	27	377
PSAD	Cre05.g238332.t1.1	Photosystem I reaction center subunit II, 20 kDa	MAVMMRTQAPAATRASSRVAVAARPAARRAVVVRA	MAVMMRTQAPAATRASSRVAVAARPAARRAVVVRAEAEAAPAAAKKAAEKPAWTVPTLNPDTPSPIFGGSTGGLLRKAQTEEFYVITWEAKKEQIFEMPTGGAAIMRQGPNLLKFGKKEQCLALTTQLRNKFKLTPCFYRVFPDGKVQYLHPADGVYPEKVNAGRVGANQNMRRIGQNVNPIKVKFSGRMMSPAEI	35	196
Cre05.g241655	Cre05.g241655.t1.1		MSMCIARGSVRGCARPVVAQHRPARSRVVSIAC	MSMCIARGSVRGCARPVVAQHRPARSRVVSIACSAAPPAESSSTAEPAAQAVVTKKVTIRKPLGLVFEQARDGGPIFVAEVTAGGNADKSGAVAVGDILSRCSAVVLKAGKEGRYENEGYGERPYDNWETIEYDCEGKEFKTVMTALKSNNERWGKMDVTLVLRKP	33	166
HSP70B	Cre06.g250100.t1.2	Heat shock protein 70B	MPVQQMTSMRSQSLAGAPVAPVKAGRAGVSRRGLAVSVRA	MPVQQMTSMRSQSLAGAPVAPVKAGRAGVSRRGLAVSVRAEKVVGIDLGTTNSAVAAMEGGKPTIITNAEGGRTTPSVVAFTKTGDRLVGQIAKRQAVVNPENTFFSVKRFIGRRMSEVGSESTQVPYRVIEDGGNVKIKCPNAGKDFAPEEISAQVLRKLTEDAAKFLNDKVEKAVITVPAYFNDSQRQATKDAGKIAGLEVLRIINEPTAASLAYGFDKKANETILVFDLGGGTFDVSVLEVGDGVFEVLSTSGDTHLGGDDFDKRIVDFLADDFKKSEGIDLRKDRQALQRLTEAAEKAKIELSGMAQTSINLPFITATADGPKHIDTQLTRAKFEEMCNDLLERCKVPVQQALRDAKLSISDIQEVILVGGSTRIPAVQEIVRKLSGGKDPNVTV…	40	679
ALB3.1	Cre06.g251900.t1.2	ALBINO3-like translocon protein	MSSSMCLARCSASLSAGNFPSRMFMGRLHAQRRTRTLQLRCAASLLPDQPTLAASSAISPVPSDLPEVLGDALHRLGAMYVLA	MSSSMCLARCSASLSAGNFPSRMFMGRLHAQRRTRTLQLRCAASLLPDQPTLAASSAISPVPSDLPEVLGDALHRLGAMYVLADASASTAAAAVMPTAVDSAAGAAPQRAGGWVAPVADALEQVLYALQEGLDKLHVPYSYGYSIILLTLIVKLLTYPLTKQQVESAMAVQALKPRIDLIKDRFGEDKDKIQKETSVLYEQAGVNPLAGCLPTLATIPIFIGLFSSLTNVANDGLLDTQGFYFVPSLAGPTTMAMRQSGLGTSWLWPLGPDGAPPIGWEDAAAYLTLPLLLVAVQYASSSVTSPPIDPKDENANTQRALLVFLPLMVGWFSLNVPAGLSLYYLANTVLSSAIQIYLKKLGGANVVMNELGPVTKPGSGRRNGVAAGEWSVWKPATVLTT…	83	495
PRX1	Cre06.g257601.t1.2	2-cys Peroxiredoxin	MAALQSASRSSAVAFSRQARVAPRVAASVARRSLVVRA	MAALQSASRSSAVAFSRQARVAPRVAASVARRSLVVRASHAEKPLVGSVAPDFKAQAVFDQEFQEITLSKYRGKYVVLFFYPLDFTFVCPTEITAFSDRYKEFKDINTEVLGVSVDSQFTHLAWIQTDRKEGGLGDLAYPLVADLKKEISKAYGVLTEDGISLRGLFIIDKEGVVQHATINNLAFGRSVDETKRVLQAIQYVQSNPDEVCPAGWKPGDKTMKPDPKGSKEYFSAV	38	235
ATPC	Cre06.g259900.t1.2	Chloroplast ATP synthase gamma chain	MAAMLASKQGAFMGRSSFAPAPKGVASRGSLQVVAGLKEV	MAAMLASKQGAFMGRSSFAPAPKGVASRGSLQVVAGLKEVRDRIASVKNTQKITDAMKLVAAAKVRRAQEAVVNGRPFSENLVKVLYGVNQRVRQEDVDSPLCAVRPVKSVLLVVLTGDRGLCGGYNNFIIKKTEARYRELTAMGVKVNLVCVGRKGAQYFARRKQYNIVKSFSLGAAPSTKEAQGIADEIFASFIAQESDKVELVFTKFISLINSNPTIQTLLPMTPMGELCDVDGKCVDAADDEIFKLTTKGGEFAVEREKTTIETEALDPSLIFEQEPAQILDALLPLYMSSCLLRSLQEALASELAARMNAMNNASDNAKELKKGLTVQYNKQRQAKITQELAEIVGGAAATSG	40	358
LHCA8	Cre06.g272650.t1.2	Light-harvesting protein of photosystem I	MALTMKRSGVAARSASSRKSVVTCVA	MALTMKRSGVAARSASSRKSVVTCVARQSWLPGSQIPAHLDTPAAQALAGNFGFDPLGLGKDPVALRWYQQAELIHCRTAMAGVAGILIPGLLTKAGALNVPEWYDAGKVAIENSFAPWGSLLAVQLFLCGFVEAKRWQDIRKPGSQGEPGSFLGFEASLKGTSELGYPGGPFDPLGLSKEADKWADWKLKEVKNGRLAMLAFLGFVAQKYATGAGPVDNLAAHLKDPWHVNYATNGVSLPFL	26	243
LHCA1	Cre06.g283050.t1.2	light-harvesting protein of photosystem I	MALSMRTLSARTAAPRGFSGRRVAAVSNGSRVTM	MALSMRTLSARTAAPRGFSGRRVAAVSNGSRVTMKAGNWLPGSDAPAWLPDDLPGNYGFDPLSLGKEPASLKRFTESEVIHGRWAMLGVAGSLAVELLGYGNWYDAPLWAVNGGKATWFGIEVPFDLNALLAFEFVAMAAAEGQRGDAGGVVYPGGAFDPLGFAKDSSKSGELKLKEIKNGRLAMVAFLGFVAQHAATGKGPIAALGEHLANPWGANFATNGISVPFF	34	228
LHCBM4	Cre06.g283950.t1.2	Light-harvesting Chlorophyll a/b binding protein of LHCII	MAFALATSRKALQVTC	MAFALATSRKALQVTCKATGKKTAAKAAAPKSSGVEFYGPNRAKWLGPYSENSTPAYLTGEFPGDYGWDTAGLSADPETFKRYRELELIHARWAMLGALGCLTPELLAKNGTKFGEAVWFKAGAQIFSEGGLDYLGNPSLVHAQNIVATLAVQVILMGLIEGYRVNGGPAGEGLDPLYPGESFDPLGLADDPDTFAELKVKEIKNGRLAMFSMFGFFVQAIVTGKGPVQNLDDHLANPTVNNAFAFATKFTPSA	16	254
FAP355	Cre06.g285401.t1.1	Histone-like Flagellar Associated protein	MALLMRSQTLRPVSAVASRRVSVVVRAQAGAEKSASNTTGKAKL	MALLMRSQTLRPVSAVASRRVSVVVRAQAGAEKSASNTTGKAKLVEAIATEVGLTKDVAAKAFDSLIGGIEDALINGDRVTIVGFGTFEVRERAARQGRNPSTGAVLQIAASKAPVFKASVGLKDA	44	126
PRPL27	Cre06.g300800.t1.2	Chloroplast ribosomal protein L27	MLASTIQSSVLRSSVRAAPAPKRALVIQNAHKKGSGSTKNGRDSNAKRRGVKVYGGQPVKAGGIIVRQCGSTWNAGDNCMLGRDFTVF	MLASTIQSSVLRSSVRAAPAPKRALVIQNAHKKGSGSTKNGRDSNAKRRGVKVYGGQPVKAGGIIVRQCGSTWNAGDNCMLGRDFTVFSTVEGVVVFDKKRVKPEIHVYPADHPKAVAALAKTHTKQPAEGQQSRAERRKATYTSRKATLSVAQVAAPTTP	88	161
RBD1	Cre07.g315150.t1.2	rubredoxin	MALLAPTTRCLSRPASSSRAAVAVPRLPIRARNVRVF	MALLAPTTRCLSRPASSSRAAVAVPRLPIRARNVRVFSSTETDPELMGEAERKKLEAEKLRAAEKFMVIGSGSATCKGCGYEYKPEKGDPEFPVAPGTTYQSLPEDYTCPICGAPKTKFESRVKVVAGFAENQQYGLGGNSMTEAQKSGLIYGALALFFALFLAGYALE	37	169
PURM	Cre07.g318750.t1.2	Aminoimidazole Ribonucleotide synthetase	MQQTVLRASSGAVSGRPTAVPVATRASQRGRVALRPVA	MQQTVLRASSGAVSGRPTAVPVATRASQRGRVALRPVAAAILNKPDSDEGLTYKKAGVDIDAGDELVDRIKKMNPKANIGGFGGLVPFGDSYLVAGTDGVGTKLKLAFDLNKHDTVGIDLVAMSVNDIITLGAKPLFFLDYYATGHLDVDTAEKVIKGIVDGCNDSDCILLGGETAEMPGFYQKGEYDLAGFAVGAVKKDRVIDGKTIKAGDVVLGLASSGVHSNGFSLVRKVLEVSNTSLHAPCPWDSGKSMGEALITPTVIYVRKVLELHEKVGLKGVVHITGGGMPENIPRVIPKGLGVNVKDGSWEVPELFKWVQATGKVPIDDMRRTFNMGVGLIMVVDPSKVADIQKIAPDAFLLGEVVPGNGVKYV	38	373
PSAH	Cre07.g330250.t1.2	Photosystem I reaction center subunit H	MALVARPVLSARVAASRPRVAARKAVRVSAKYGENSRYFDLQDMEN	MALVARPVLSARVAASRPRVAARKAVRVSAKYGENSRYFDLQDMENTTGSWDMYGVDEKKRYPDNQAKFFTQATDIISRRESLRALVALSGIAAIVTYGLKGAKDADLPITKGPQTTGENGKGGSVRSRL	46	130
Cre07.g344400	Cre07.g344400.t1.2	Phosphoglycerate dehydrogenase / Phosphoglyceric acid dehydrogenase	MAIMLRSHQLKQEEVPPTVRCIVRCGAGVNNIPVPKMTELGIPVFNTPGANANAVKELVICGLLLASRGILEGNKY	MAIMLRSHQLKQEEVPPTVRCIVRCGAGVNNIPVPKMTELGIPVFNTPGANANAVKELVICGLLLASRGILEGNKYTEEVIYKEENMDYDKVAKRIEKDKAKFVGCEIEGKTLGVVGLGAIGGRVVNAALALGMKVVGYDPVLSLDAAWKLPGDRMARAESLEDLLKVSDYVTVHVPYIKGATHHMINGTNLKQCKPNVSFLNFSRTEIIDGEALRDMYKAGRLTGKYISDFADPFLSGHPKHLVIPHLGASTEEAEDNSAAMAAETVKDFLETGTIRNSVNFPQTVLDKKPGHIGGRLCIVNKNEAGVLGQITTFLGTQNINIEQQINTSRGDIAYTVLDFGKVEDPAGLQAGLAKACPAIISSRFIGNVFDDELGQPGTYFYVKWANSA	76	391
LHCA9	Cre07.g344950.t1.2	Light-harvesting protein of photosystem I	MIAAKSQVALGRRAPVRGQRVVAA	MIAAKSQVALGRRAPVRGQRVVAAASARPTWLPGLNPPAHLKGALAGDNGFDPLGLGQDEGRLKWYAEAEKTNGRWAMMAVAGILGQELLGVTPAWWEAGAKEYDIPAQALTPIEFIVMGFLEIKRYQGFKQTGTSGFINSFPFDPAGMNSPSMATKEVKNGRLAMVAFIGFCVQALATRTQPIEGLTAHLADPFGKNITYYLTHLPETLGSA	24	213
CRD1	Cre07.g346050.t2.1	Copper response defect 1 protein	MQTTLKQQRASGRVSARQPFRSAAVARPRRSTVRVQA	MQTTLKQQRASGRVSARQPFRSAAVARPRRSTVRVQASAAPLNDGLGFETMRDGIKVAAKETLLTPRFYTTDFDEMEQLFSKEINPNLDMEELNACLNEFRNDYNKVHFVRNETFKAAADKVTGETRRIFIEFLERSCTAEFSGFLLYKELARRMKASSPEVAEMFLLMSRDEARHAGFLNKALSDFNLALDLGFLTKNRTYTYFKPKFIIYATFLSEKIGYWRYITIYRHLQRNPDNQFYPLFEYFENWCQDENRHGDFLAACLKAKPELLNTFEAKLWSKFFCLSVYITMYLNDHQRTKFYESLGLNTRQFNQHVIIETNRATERLFPVVPDVEDPRFFEILNKMVDVNAKLVELSASSSPLAGLQKLPLLERMASYCLQLLFFKEKDVGSVDIAGS…	37	407
LHCSR1	Cre08.g365900.t1.2	Stress-related chlorophyll a/b binding protein 1	MAMMMRKAAAVPASSRRSVAVNSVSGKRTVSGKAGAPVPEDVLAYAKTLPGVTAPFDNVFDPAGFLATASVKDVRRWRESEITHGRVAMLAALGF	MAMMMRKAAAVPASSRRSVAVNSVSGKRTVSGKAGAPVPEDVLAYAKTLPGVTAPFDNVFDPAGFLATASVKDVRRWRESEITHGRVAMLAALGFIVGEQLQDFPLFFNFDGRVSGPAIYHFQQIGQGFWEPLLIAIGVAESYRVAVGWATPTGTGFNSLKDDYEPGDLGFDPLGLKPTDPEELKTLQTKELNNGRLAMIAIAAFVAQELVEQTEIFEHLVLRFEKEVILELEDVERDLGLPLTPLPDNLKAI	95	253
LHCSR3.2	Cre08.g367400.t1.1	Stress-related chlorophyll a/b binding protein 3	MLANVVSRKASGLRQTPARATVAVKSVSGRRTTAAEPQTAAPVAAEDVFAYTKNLPGVTAPFEGVF	MLANVVSRKASGLRQTPARATVAVKSVSGRRTTAAEPQTAAPVAAEDVFAYTKNLPGVTAPFEGVFDPAGFLATASIKDVRRWRESEITHGRVAMLAALGFVVGEQLQDFPLFFNWDGRVSGPAIYHFQQIGQGFWEPLLIAIGVAESYRVAVGWATPTGTGFNSLKDDYEPGDLGFDPLGLKPTDPEELKVMQTKELNNGRLAMIAIAAFVAQELVEQTEIFEHLALRFEKEAILELDDIERDLGLPVTPLPDNLKSL	66	259
ASD1	Cre09.g389689.t1.1	Aspartate semialdehyde dehydrogenase	MQLTRTQVSRSGVRPTRASRRVLVAKAAKTANGPRVAIV	MQLTRTQVSRSGVRPTRASRRVLVAKAAKTANGPRVAIVGITGAVGQEFLTVLTERNFPYSSMKMLASARSAGKKQEFEGVSYTIEELTENSFNDVDIALFSAGGSISKKLGPIAAKAGAIVVDNSSAFRMTEGVPLVIPEVNPEAMSHIKVGKGGAIIANPNCSTIIALMAVTPLDRVANVKRMCVSTYQAASGAGAAAMEELRQQTRDVLDGKPAQPKIFPQQYAFNLFSHNSGMDVALGYNEEEMKLVKETRKIWNNPGIRITATCVRVPVMRAHAESINLEFEKDISEAQALEALAAFPGVSIINDRQNNRFPTPLDATTKDNVFVGRVRRDISRDDNKGLDLFVCGDQIKKGAALNAVQIAELLL	39	370
ELI2	Cre09.g393173.t1.1	Early light-inducible protein	MQSLASRPCVLRAQRPFTAKRSSVVRVRA	MQSLASRPCVLRAQRPFTAKRSSVVRVRAEASSSSPVPIPVWPKDTESARDVFAFGGSAPERVNGRVAMMGFVSILGPELSKKQPVLEQVGDAWFGILLFSLTITFASILPKLVSGVSLKELHSVATSENLKGEGLQQALALFDTNVELWAGRLAMLGFAGLIALETIKGGEAFF	29	175
Cre09.g396438	Cre09.g396438.t1.1		MPAGAGGAARALLLKLLSLLRTGIRMRTAVRKRVHTPAATVMGTFSRRLMRICESAVGMLQRVA	MPAGAGGAARALLLKLLSLLRTGIRMRTAVRKRVHTPAATVMGTFSRRLMRICESAVGMLQRVAGSEDDDHGALDIARIVRVFEAVRKSTVQLGKDQTFAMLGPHSIGKSTALSVQILRHMDLSAYAADPYPNDLVRLLPALEHMMATYTVGASDEYDEDLLLELATDPAEMLVVNMPPDYAADVAEKEYKRSLGILKRYGEDCKLSGLRTLLPSMLPHGQGTTQVATCYSFYSYGLMVADLMTVEQVQDKASAFIKHLAMVFRQAARDGGAGSAKARWSRMGDNGKPEWYNECVGENDEDADEESEELEDGEVQTVEKIKRMKEAELEVLRDWYLEACGTQLPWDADKTTGIPFIGTDKDKVPVLLWLADIQVLLNNLSGIDQYKAAAERIKSCLPTE…	64	1517
Cre09.g401350	Cre09.g401350.t1.2		MLAHTNLTSSGASTVRPAHKRFHGRVSVVPRA	MLAHTNLTSSGASTVRPAHKRFHGRVSVVPRAAAGAPAAISAATDALATLRSAAAKPGSVKPSDVLAAMVTVEKAKLKPENWEANLTAPGTRWRLVYTVSGKDLTAAAKKQKAGSGAYFPISACQKFDDTGFENGVFFGPVANLTFKGPWQLDAKVCHFDVNTMYLGLGPWRLPIKLKDQTPLKQMATKEFKALPFFVYAYVGEDIVVARGRSGGVALWGRADAAWLATSGAMQVYK	32	237
Cre09.g410250	Cre09.g410250.t1.1		MLSTRTRASAAPASRRSRSTVVSVRA	MLSTRTRASAAPASRRSRSTVVSVRAYVADAPANVLEARAWIAAWKARSGAAPAAAAAKADVPANVIEARQWIAAWKARQAPAAAPAAPAPAAAAAKADVPANVIEARQWIAAWKAGQAPAAAPAASAPAAAAPAPAAHQPAPAKAAPAPVAAAAPKPVVSADGTITFSAQMLASIKADELLKKLHKH	26	188
MDN5	Cre09.g410700.t1.2	NADP-Malate Dehydrogenase	MALNMKQQQAGLSRKAARSVSSRAPVVVRAVAAPVAPAAEAEAKKAYGVFRLSYDTQNEDASLTRSWKKTVKVAVT	MALNMKQQQAGLSRKAARSVSSRAPVVVRAVAAPVAPAAEAEAKKAYGVFRLSYDTQNEDASLTRSWKKTVKVAVTGASGNIANHLLFMLASGEVYGKDQPIALQLLGSERSKEALEGVAMELEDSLYPLLREVSIGTDPYEVFGDADWALMIGAKPRGPGMERADLLQQNGEIFQVQGRALNESASRNCKVLVVGNPCNTNALIAMENAPNIPRKNFHALTRLDENRAKCQLALKSGKFYTSVSRMAIWGNHSTTQVPDFVNARIGGLPAPDVIRDMKWFREEFTPKVALRGGALIKKWGRSSAASTAVSVADAIRALVVPTAPGDCFSTGVISDGNPYGVREGLIFSFPCRSKGDGDYEICDNFIVDEWLRAKIRASEDELQKEKECVSHLIGMMGG…	76	415
AGS1	Cre09.g416050.t1.2	Argininosuccinate synthase	MLGMKLSPRHVSSRAKPAPAMRGRKVCVSVNAAAPKMGQVKKVVLAY	MLGMKLSPRHVSSRAKPAPAMRGRKVCVSVNAAAPKMGQVKKVVLAYSGGLDTSIILKWLQDTYGCEVVTFTADLGQGEELEPARAKAEKMGVKQIFIDDLREEFVRDYVFPMFRANALYEGTYLLGTSIARPLIAKRQIEIAKEVGADAVSHGATGKGNDQVRFEVGYYSLKPDIKVIAPWREWDLLSRTKLIEYAEQNNIPVPASKRGEPPFSMDANLLHISYEGNALEDPWTTPDDSMFTRSVSPEKAPDQPTTIEIAFEKGNPVAIDGVPMSPATILTKLNELGGQNGIGRVDLVESRFVGMKSRGVYETPGGTILQVAHRGMESICLDREELHMKDDLMPRYAQLVYNGFWFSPEREALQALVDKTQEYCTGVVKVKLYKGNVQVQGRKSPYSL…	47	441
PSAE	Cre10.g420350.t1.2	Photosystem I reaction center subunit IV, 8.1 kDa	MQALSSRVNIAAKPQRAQRLVVRAEEVKAAPKKEVGPKRGSLVKILRPESYWFNQVGKVVSVDQSGVRYPVVVRFENQNY	MQALSSRVNIAAKPQRAQRLVVRAEEVKAAPKKEVGPKRGSLVKILRPESYWFNQVGKVVSVDQSGVRYPVVVRFENQNYAGVTTNNYALDEVVAAK	80	97
LHCA5	Cre10.g425900.t1.2	Light-harvesting protein 5 of photosystem I	MAALMQKSALSRPACSTRSSRRAVVVRAAADRKLWA	MAALMQKSALSRPACSTRSSRRAVVVRAAADRKLWAPGVVAPEYLKGDLAGDYGWDPLGLGADPTALKWYRQSELQHARWAMLGVAGVLVQEIVKPDVYFYEAGLPQNLPEPFTNINMGGLLAWEFILMHWVEVRRWQDYKNFGSVNEDPIFKGNKVPNPEMGYPGGIFDPFGFSKGNLKELQTKEIKNGRLAMIAYMAFILQAQATGKGPLAALSAHLSNPFGNNILKNIGTCTVPHSVDVQGLTIPLTCLWPGSQ	36	257
Cre10.g433950	Cre10.g433950.t1.1		MMLKASTVTTLPARKGVRAVARSAALPVPVNKRAVLVRAEPESSTSAEDPSVKLQKQAEEVLKQVQGKWESTDDSEKPAAIAIIVGVIVAQ	MMLKASTVTTLPARKGVRAVARSAALPVPVNKRAVLVRAEPESSTSAEDPSVKLQKQAEEVLKQVQGKWESTDDSEKPAAIAIIVGVIVAQIAIGATIDAVDKIPIVNKGLQLIGVAVTGLFTYRYFTDPAERESVKKSIDAFVKSVTGEK	91	151
FSD1	Cre10.g436050.t1.2	Fe superoxide dismutase	MALAMKAQASSLVAGQRRAVRPASGRRAVITRAALELKSP	MALAMKAQASSLVAGQRRAVRPASGRRAVITRAALELKSPPYALDALEPHMSKQTLEFHWGKHHRAYVDNMNKQVAGTPLDGKSLEEIVLASWNNGQPTPVFNNAAQVWNHTFFWESMKPNGGGAPTGALAEAITRDFGSLDKFKEEFKQAGMTQFGSGWAWLNADKTGKLSISKSPNAVNPVVEGKTPILTVDVWEHAYYIDVQNRRPDYITTFMEKLINWDAVAQRYAAATK	40	234
TRXy	Cre10.g446100.t1.2	Chloroplastic thioredoxin y	MALVARRAAVPSARSSARPAFARAAPRRSVVVRAEAGAVNDDTFKNVVLESSVPVLVDFWAPWCGPCRII	MALVARRAAVPSARSSARPAFARAAPRRSVVVRAEAGAVNDDTFKNVVLESSVPVLVDFWAPWCGPCRIIAPVVDEIAGEYKDKLKCVKLNTDESPNVASEYGIRSIPTIMVFKGGKKCETIIGAVPKATIVQTVEKYLN	70	140
LHCA4	Cre10.g452050.t1.2	light-harvesting protein of photosystem I	MAFVLAKSSAFGVAAKPVSRRSSVAVKASAVPENVKEAREWIDAWKSKSGGAKRDAALPSWMPGADLPGYLNGTL	MAFVLAKSSAFGVAAKPVSRRSSVAVKASAVPENVKEAREWIDAWKSKSGGAKRDAALPSWMPGADLPGYLNGTLPGDFGFDPLYLGQDPVKLKWYAQAELMNARFAMLAVAGILVPELLSNIGFSWPGAGVAWYDAGKFEYFAPASSLFGVQMLLFAWVEIRRYQDFVKPGSANQDPIFTNNKLPDGNEPGYPGGIFDPFGWSKGDIKSLKLKEIKNGRLAMLAFAGFIGQAYTTGTTPLKNLSTHLADPWSTTVWQNDLARL	75	264
Cre10.g452350	Cre10.g452350.t1.1		MQTLSVKSTRASVVPRRGRATTVAVKA	MQTLSVKSTRASVVPRRGRATTVAVKALSLQEATNWFGQAFVRIFSPDDTKVKNYPVNNFSGRISHHEGPSRPFKDGFQSNAPLPPSSSIEAANQEGAAGYVEDAVKGVVSGLVSEPSGTEPGAWTGAAGWKGGVHSSENKRDAREGFHVKKY	27	153
LHCA3	Cre11.g467573.t1.1	light-harvesting chlorophyll-a/b protein of photosystem I (Type III)	MMLTKSAQAAFSGKVARPAKANRARLVCRAEEKSIAKVDRSKDQLYVGASQSSLAYLDGSLPGDFGFDPL	MMLTKSAQAAFSGKVARPAKANRARLVCRAEEKSIAKVDRSKDQLYVGASQSSLAYLDGSLPGDFGFDPLGLLDPVNSGGFIEPKWLQYSEVIHARWAMLGAAGCIAPEVLGAAGLIPDATNIKWFESGVIPPAGSYNGYWADPYTIFFVEIVAMQFAELRRLQDFRYPGSMGQQYFLGLEAIFKGSGDAAYPGGPFFNLFNLGKTEAAMKELKLKEIKNGRLAMLAMLGYGAQAVMTGKGPFQNLVEHLADPVNNNILTNFAGRVSGSSQPWRPHGWWRRRYRSVAALALIRNRSVC	70	298
PETC	Cre11.g467689.t1.1	Chloroplast cytochrome b6f Rieske iron-sulfur center subunit	MAMLSSRRVAAPAKASAIRRSRVMPVVRAAAASSEVPDMNKRNIMNLILAGGAGLPITTLALGYGAFFV	MAMLSSRRVAAPAKASAIRRSRVMPVVRAAAASSEVPDMNKRNIMNLILAGGAGLPITTLALGYGAFFVPPSSGGGGGGQAAKDALGNDIKAGEWLKTHLAGDRSLSQGLKGDPTYLIVTADSTIEKYGLNAVCTHLGCVVPWVAAENKFKCPCHGSQYNAEGKVVRGPAPLSLALAHCDVAESGLVTFSTWTETDFRTGLEPWWA	69	206
UROD1	Cre11.g467700.t1.1	Uroporphyrinogen-III decarboxylase, chloroplast precursor	MQTKAFTSARPQRAAALKAQRTSSVTVRA	MQTKAFTSARPQRAAALKAQRTSSVTVRATAAPAVASAPAASGSASDPLMLRAIRGDKVERPPVWMMRQAGRYQKVYQDLCKKHPTFRERSERVDLAVEISLQPWHAFKPDGVILFSDILTPLPGMNIPFDMAPGPIIMDPIRTMAQVEKVTKLDAEAACPFVGESLRQLRTYIGNQAAVLGFVGAPFTLATYIVEGGSSKNFAHIKKMAFSTPEILHALLDKLADNVADYVRYQADAGAQVVQIFDSWASELQPQDFDVFSGPYIKKVIDSVRKTHPDLPIILYISGSGGLLERMASCSPDIISLDQSVDFTDGVKRCGTNFAFQGNMDPGVLFGSKDFIEKRVMDTIKAARDADVRHVMNLGHGVLPGTPEDHVGHYFHVARTAHERM	29	390
Cre11.g467755	Cre11.g467755.t1.1	Extended short-chain dehydrogenase	MQVLRGAAQHGHSQLGTSQTRAARSTKPCVHMSTSVKSHASHVNRQELAPEATARPVDAVDAPAPTPGVPTRRRGLLLFGLASVAASCSGLDLAACA	MQVLRGAAQHGHSQLGTSQTRAARSTKPCVHMSTSVKSHASHVNRQELAPEATARPVDAVDAPAPTPGVPTRRRGLLLFGLASVAASCSGLDLAACAAEGITTVFVAGSTGNTGRRVVQQLRQAGFKVRAGARSTAKALSLGFGADAGIEVVEADVTKGVDELVAAIGSAQAVVCATGAVGFGSNGAAAVDEKGTIKLVDAASRAGGVTKFVLVSSLLTNASAVGQSNNPNYKFLNLFGGVLDAKLRAEKYLRSSGINYTIIRPGGLSNEPESEVGNVILRREDSLFGLDSDPGRAISRDTVAAVAVQALLQPAASKDKVVEIVASPSAPRLSPDTWFENV	97	341
CPLD48	Cre11.g468750.t1.2	Conserved in the Plant Lineage and Diatoms	MLQAQKRVVFGQAQRRSAVAVVRTAPVARRMVCQAANWKGDSEEKLQPKEIVLRSVNVMVLG	MLQAQKRVVFGQAQRRSAVAVVRTAPVARRMVCQAANWKGDSEEKLQPKEIVLRSVNVMVLGALLSIGAAPRPGNLGIIDYGAGVQTLNLCPPSPNCIATSEEGNDRTHYAPPLTYNPEDGRGKKGPASQEKAMGELVEAVKKLKPDGFTPKIIKQTDDYLYVEYESPLMGFIDDVEFWFKPGPGSRVEYRSASRVGESDGNINRKRIKAIRQELETKGWRSTGF	62	225
PRPL4	Cre11.g479500.t1.2	Chloroplast ribosomal protein L4	MQTMRVAFRPAATSRSTVVTRA	MQTMRVAFRPAATSRSTVVTRASAVAAPASIPYKAADGSSKGTQQLALKVAEDSAKGLVHRYLVMVQQNARQGTASTLTRSEVRGGGKKPYAQKGTGNARRGSSVSPLFPGGGVTFGPKPKDWSISMNKKERRLALATALQSATADMIVVESLAGKLQDTKTKSMVALLEKLGANAMERKVLLITKEERPDVTLAGRNIAKLTMNTASAISVFDVLNADHIIIEDEALAHVQSFYGAAAPASA	22	243
ATPG	Cre11.g481450.t1.2	Chloroplast ATP synthase subunit II	MPAAAEAGKIFDFNLTLPVMAGEFLLLMVFLEKTWFTPVGKVLDERDNLIRSKLGSVKDN	MPAAAEAGKIFDFNLTLPVMAGEFLLLMVFLEKTWFTPVGKVLDERDNLIRSKLGSVKDNTGDVDKLVLEAETILKSARSDVSAMINTKKAAKQSELDKTYNEAKAKITAEVESSIAGLEQESASMLKSLDAQVDKISAEVLKRVLPEGVRV	60	152
GGPS	Cre12.g484200.t1.2	Geranylgeranyl pyrophosphate synthase, putative chloroplast precursor	MQMQQQRMRFSRDARRIG	MQMQQQRMRFSRDARRIGASRVPLAKAAPGRKVVAQVATATAEKVDVKQAGSFDFNTYMVDRAKLVNKAMDEAVPLKYPETLNESMRYSLLAGGKRVRPALCLAACELVGGDIHAALPAACAMEMVHTMSLIHDDLPSMDNDDFRRGRPTNHKVYGEDIAILAGDALLSFSFEHIARATKGVPAERVLRVIMELGKAVGQDGLVAGQVVDIQSEDKEVGLDVLKYIHEHKTAALLEASVVCGAILGGADESTIEKLRKYSLNIGLAFQVIDDILDVTATTEQLGKTAAKDLAVNKTTYPKLLGLEKSKQVADDLIKEAIQQLDGFDAAKAAPLVALAKFIGYRQN	18	345
PSAL	Cre12.g486300.t1.2	Photosystem I reaction center subunit L	MAVAMRSSTGLRATAARRQMPLGLGRVSTVRVCAADTKKAQVISPVNGD	MAVAMRSSTGLRATAARRQMPLGLGRVSTVRVCAADTKKAQVISPVNGDPFVGMLETPVTSAPIVATYLSNLPAYRTGVAPVLRGVEIGLAHGFLLAGPFIKASGGELGPLRNVPETAEIAGSLSAAGLVLILALCLSIYGSAQFQSTPSIGVKTLSGRSVARDPLFSADGWSEFAAGFLVGGEAGVAWAYVCTQILPYYS	49	201
CGL78	Cre12.g490500.t1.2	Conserved in the Green Lineage	MLILGAQEYYALVCNAEWF	MLILGAQEYYALVCNAEWFFMDPQNESVAEQLREKVRFFKEQNKERDFFIVPNPKWLDAKFPEQAKQVKRPCVALVSTDKMWITFMKLRLDRVLKIDLKSMPASEVLAAGEALPDFKPDGKWTAPYARYTPGWWNVFLPNH	19	141
PRPS16	Cre12.g494450.t1.2	Chloroplast ribosomal protein S16	MQALSAKRSLGSIQPFTSSRVAVARPARVATVIENRVALRFQRFGRKKLPFYRLVAIDSKKRRDGEPLEYLGWYDPLKKETNLNAPAIKEWLAKGAL	MQALSAKRSLGSIQPFTSSRVAVARPARVATVIENRVALRFQRFGRKKLPFYRLVAIDSKKRRDGEPLEYLGWYDPLKKETNLNAPAIKEWLAKGALPSETVENLLRKAYVMEPKVAKVVVPKDAVKV	97	128
LHCA2	Cre12.g508750.t1.2	Light-harvesting protein of photosystem I	MAMLLKSRVSAGVSRPSRATVRVSA	MAMLLKSRVSAGVSRPSRATVRVSASTRPMWYPGATAPAHLDGSMLGDYGFDPLRLGVNKDNLKWFREAELTNGRWAMAAVVGILFTDAVGLPKFWTAGAEKYALDNQTLALIEVAVFAVLEGKRYEIYKKTGETGFLSFAPFDPMGMKSEEMKLKELKNGRLAMLAFLGFCSQAAVYGKGPIETLQLHLADPGHNNIYTSSVGPETAVTVAVLCVLPMIIEATKTLNPGKESVPYFPWNEPWNKV	25	246
CPLD30	Cre12.g510400.t1.1	Conserved in the Plant Lineage and Diatoms - Putative rubredoxin-like protein	MALAMQRSAAPRQAFGAKPAVRSGVRVARSRASAVSVRA	MALAMQRSAAPRQAFGAKPAVRSGVRVARSRASAVSVRADGAQVQVDIDKPLGLVLEQSTAPGGGLVVKSSRGNAAKVGIKAGDTIIYTSSFFGDELWPADKLSFTNNAVANCPSPVTFVYVPGENTKVNVKRLPKKPAPARFGRKLTSAEKALASHICVDCGYIYCDSTPFDDTAANYRCPQCNAPKRRFVPYDAESGKSTGVAEGTIGTIATVVGGLLGIGVLTYLATSV	39	232
RPE1	Cre12.g511900.t1.2	Ribulose phosphate-3-epimerase, chloroplast precursor	MQALQMRSSSKAVGARSAKPSRASAVRVQATSRVDKCKKSDIIVSPSILSADFSRLGDEVRAIDQAGCDWVHIDVMDGRFV	MQALQMRSSSKAVGARSAKPSRASAVRVQATSRVDKCKKSDIIVSPSILSADFSRLGDEVRAIDQAGCDWVHIDVMDGRFVPNITIGPLVVEALRPVTDKVLDVHLMIVEPELRIPDFAKAGADIISVHAEQSSTIHLHRTLNMVKDLGCKAGVVLNPGTSLSTIEEVLDVVDLILIMSVNPGFGGQKFIESQVAKIRNLKRMCNEKGVNPWIEVDGGVTPENAYKVIDAGANALVAGSAVFKAKSYRDAIHGIKVSKAPANVMA	81	265
MET16	Cre12.g517150.t1.1	Adenylylphosphosulfate reductase	MMLTQGRAFAAQRPAVQQRRMAVRANVARVPQVN	MMLTQGRAFAAQRPAVQQRRMAVRANVARVPQVNAAAVEAKPDWAGLAAEMDNKSPLEIMDHALKTFGNDVAIAFSGAEDVALIEYAHLTGRPYRVFSLDTGRLNAETYQLFDAVEKHYKIRIEYTFPEAQEVMDLVRAKGLYSFYEDGHTECCRIRKVKPLRKQLKVYKAWITGQRKDQSPGTRTEVPVVQVDPVFEGVTGGPGSLIKYNPLSNMTSAEVWNFLRVMNVPTNKLHNCGYISIGCEPCTRPVLPNQAEREGRWWWEDAAAKECGLHSGNIKKADGTTEERKAERDLWPAGSAVATLSKDEVRALAAGERSQGTLAVLYAPWCPFCQAMEANFEELAKHMTGHKVRVAKYQADIDREFCNENLQLKTFPTIVYLPPNSKQVIKYPSERRD…	34	413
PRPS6	Cre12.g520600.t1.2	Chloroplast Ribosomal Protein S6	MATMQKSSVAVRSSSSANLVAARPIAQRLCFQPVVRQSAQQQRSSVGRAMPKVVAAAVAADAAAETVKLPAGYHWYETM	MATMQKSSVAVRSSSSANLVAARPIAQRLCFQPVVRQSAQQQRSSVGRAMPKVVAAAVAADAAAETVKLPAGYHWYETMIILKPTLSDEERDRELAKFEAYLNKEECFNINALVRGRSKLAYPIKKEWEGIYVLYSYLARRQTARAVQQLLSNPEAGAEDTVLRHITLCKQ	79	171
CGL86	Cre12.g534450.t1.1	forkhead-associated domain-containing protein	MQVSFARSTVSRARAGISGRTSRRTHVAVSN	MQVSFARSTVSRARAGISGRTSRRTHVAVSNKLVLQPIGSGSTEHLDGEKVTPPGPVPLREGTLDVGRVEPCDIVLPVPTVSSRHAILTIEGDKVLVIDVNSTNGTMVNGAEIKAMDYVELPIGGEIVFGDEFLAKFQLQKLPDDA	31	146
PSBP1	Cre12.g550850.t1.2	Photosystem II Oxygen Evolution Enhancer protein 2	MATALCNKAFAAAPVARPASRRSAVVVRASGSDVSRRAALAGFAGAAALVSSSPANA	MATALCNKAFAAAPVARPASRRSAVVVRASGSDVSRRAALAGFAGAAALVSSSPANAAYGDSANVFGKVTNKSGFVPYAGDGFALLLPAKWNPSKENDFPGVILRYEDNFDAVNNLVVIAQDTDKKAIADFGSQDKFLESVSYLLGKQAYSGETQSEGGFAPNRVSAASLLDVSTTTDKKGKTYYKYELLVRSADGDEGGRHQLIGATVGSDNKLYIIKIQIGDKRWFKGAKKEAMGAFDSFTVV	57	245
PETO	Cre12.g558900.t1.2	Regulator of photosynthetic cyclic electron flow	MALRCKTPAATCAARSRRSVRVSAHKGAFEQAQVAAAAFVAAAVIAAPANAGVVLQQPVLKKAFQDDTPAAPPPKREFRGL	MALRCKTPAATCAARSRRSVRVSAHKGAFEQAQVAAAAFVAAAVIAAPANAGVVLQQPVLKKAFQDDTPAAPPPKREFRGLAPPALPQSDAPNVAAEKPKKAEVVESTSGGLDPRSVALPGALALTIGGFVAASKIDGSFNDWFMEAVVRDSNNYAGYEATLKSENGVTFPKVAAGGTKKVKAATGSKKGGFPFGGKK	81	198
PSAG	Cre12.g560950.t1.2	Photosystem I reaction center subunit V	MQTLASRPSLRASARVAPRRAPRVAVVTKA	MQTLASRPSLRASARVAPRRAPRVAVVTKAALDPQIVISGSTAAFLAIGRFVFLGYQRREANFDSTVGPKTTGATYFDDLQKNSTIFATNDPAGFNIIDVAGWGALGHAVGFAVLAINSLQGA	30	123
Cre13.g562150	Cre13.g562150.t1.2		MATRMVSAFRAAPLSTMASRTLLHRVSITATPSLVRPGAGSRGFRTTTVA	MATRMVSAFRAAPLSTMASRTLLHRVSITATPSLVRPGAGSRGFRTTTVAALQAGIVGLPNVGKSTLFNALVENGKAQAANFPFCTIEPNVGIVQVEDPRLAQLSAISGSKDLIPATVEFVDIAGLVKGASKGEGMGNQFLTNIRNTDAICQVVRCFEDDDIVHVDPLDDIDVINLELALADLEVISKRQERLRKGKKAADQAERDELELSALDKIQAAIEAGKGARTAQLTKDEAVAVKGLGLLTLKPLIYAANVMEDDLADQGANNTHVQALRKRAVEEGVQVVVVSAKVEAELNELPKEEAKEWLASLGVTDGGLSSLVRATYSTLGLQTYFTTGEKETRAWTIRKGMTAPQAAGVIHTDFEKGFIRAETIAFNDFVKNKGYSGSKEAGALRLEGK…	50	415
Cre13.g573400	Cre13.g573400.t1.2		MLAAKTCPALPARAARASARVGLRPASGVSSRRVATKAIEDTNLFVNIL	MLAAKTCPALPARAARASARVGLRPASGVSSRRVATKAIEDTNLFVNILGSGLAGAAVAAVTTFTSENKDKEIERIQTVEGALPIGAAIAADAIVHSIPGLNVLFSLLLEPTGAAAGVAYMMTLILSAPSVDPNTLAPEGTVLNAKKASDSRAAIRVPFTRIIPTALKVVDTTNDASSGAGWTIGENGLPKLPINSVLIVLGVGGVILEAAAHAPVLSFFLPRVLSVAACYAGVGYFLDKRE	49	242
PRPL7	Cre13.g581650.t1.2	Chloroplast ribosomal protein L7/L12	MALCMQTRSVGAVRRTSAVRSAPFRGSRMVVRAT	MALCMQTRSVGAVRRTSAVRSAPFRGSRMVVRATPAVSEIVDKLKTLTLLEASELVSEIEKTFGVDASAAAPVAMAAIAAPGAAAAPAVEEKTTFDVVLEEIPADKKVGVYKVVRNIANIAVNQVKDFTATLPKVLKEGLSKEDAEAAKAQLLEAGAKAKVA	34	162
PRPL15	Cre14.g612450.t1.2	Chloroplast ribosomal protein L15	MQVASRASVRPFTAARQPRSLVVVNASSDARLRLHNLSPEPGSRRDEKRKGRGYAAGQGGTCGFGNRGQKARSG	MQVASRASVRPFTAARQPRSLVVVNASSDARLRLHNLSPEPGSRRDEKRKGRGYAAGQGGTCGFGNRGQKARSGPSVRPGFEGGQTPLYRRLPKLRGIAGGMSAGLPDFVVVNLDDLEKHFNAGEDVTLAAVKEKVKSISGRDASLPLKVLGTGSLSKSLNVHATAFSESAKAAIEAAGGKAEVLAAKTKWTKKVADMAAKGMDYEKEKLKKRIDNLKAKGMFEERVPKAKPAAAAAGKKK	74	241
MCT1	Cre14.g621650.t1.1	Malonyl-CoA:acyl-carrier-protein transacylase	MVAVRGRRALAVRA	MVAVRGRRALAVRASGDDAFANYKPTIAALFPGQGAQSVGMAKDLVATVPKAKEMFDKASEILGYDLLKVCVEGPKEKLDSTAVSQPAIYVASLAAVEKLRADEGQVRVLGFEGPGYARACDVWLGGASVRHAAVATHNPRPALPPLCAPPPSARAHLISLCSHTILPPFAATEQVGQDKPVQIANYLCPGNYAVSGSKEGCDAVEKLGKSFGARMTVRLAVAGAFHTSYMSPAVDKLKAALAQVRGRGGGRVGGGEAGGGRPHSDPAVIKDILSRQVTSPVLWENTIKSLQEKGLTKSYEVGPGKVIAGIVKRMDKGANIVNITA	14	326
PETF	Cre14.g626700.t1.2	Chloroplast ferredoxin	MAMAMRSTFAARVGAKPAVRGARPASRMSCMA	MAMAMRSTFAARVGAKPAVRGARPASRMSCMAYKVTLKTPSGDKTIECPADTYILDAAEEAGLDLPYSCRAGACSSCAGKVAAGTVDQSDQSFLDDAQMGNGFVLTCVAYPTSDCTIQTHQEEALY	32	126
PBGD1	Cre16.g663900.t1.2	Porphobilinogen deaminase	MQQCVGRSVRAPSSRAVAPKVAGARVSRRVCRVYASAVATKTVKIGTRGSPLALAQAYMTRDLLKKSF	MQQCVGRSVRAPSSRAVAPKVAGARVSRRVCRVYASAVATKTVKIGTRGSPLALAQAYMTRDLLKKSFPELSEEGALEIVIIKTTGDKILNQPLADIGGKGLFTKEIDDALLSGKIDIAVHSMKDVPTYLPEGTILPCNLPREDVRDVFISPVAKDLSELPAGAIVGSASLRRQAQILAKYPHLKVENFRGNVQTRLRKLNEGACSATLLALAGLKRLDMTEHITKTLSIDEMLPAVSQGAIGIACRTDDGASRNLLAALNHEETRIAVVCERAFLTALDGSCRTPIAGYAHKGADGMLHFSGLVATPDGKQIMRASRVVPFTEADAVKCGEEAGKELKANGPKELFMY	68	349
APE1	Cre16.g665250.t1.2	acclimation of photosynthesis to environment	MAALLARSSASTAFAGRRASGVACPRAPVSPVCIRRSVVSVRA	MAALLARSSASTAFAGRRASGVACPRAPVSPVCIRRSVVSVRASAEPSAPAKPAGSQEYVEDSEFAVSKISFGSILTPVGLGLLFWGFGAYFLLLPGADLSSLFLIYGFPISLLGFALSYAQLKPVPCKTTKAAFALRESQMTDIQKQIREDVTRFRYGDEQHLEEALDRIFKPTRPGGVARKFLPTLIGIREEVIDNAYALVLEFSSTLDEAKWNEFQPKIQSFFGPGIVATVTKTGAGVDVALICDGSGAGRSGKDKKDVLPPLLPGLKARQQE	43	276
LHCB5	Cre16.g673650.t1.1	Light-harvesting minor chlorophyll a/b binding protein of photosystem II	MQIQALFKKTGASAPAKKGTASTKVVKPSKAGGKATRGW	MQIQALFKKTGASAPAKKGTASTKVVKPSKAGGKATRGWLGGQGGAADLDKWYGPDRKLFLPSGLYDRSEIPEYLNGELAGDYGYDPLGLGKDPETVAKYRENELLHARWAMLAAAGILIPEGLQANGANIKGGTWFETGAEMLNGGTLNYFAVPWGIVSNPLPLFAVIAVEVGLMGAVEFYRRNGTGPAGYSPGIGKFDSSVFDGLDPLYPGGPFDPLGLADDPEVLQELKVKEIKNGRLAMVSVLGFAVQSYVTGEGPYANWTKHVADPFGYNLLTVLGAEERTPTL	39	289
LHCA7	Cre16.g687900.t1.2	Light-harvesting protein of photosystem I	MALSMIAQRRAGAFSARQAPRAVRAQ	MALSMIAQRRAGAFSARQAPRAVRAQAAVRPVWFPGNPPPAHLDGSLAGDYGFDPLFLGQEPQTLKWYVQAELVHGRFAMLGAAGIILTSIGAKVGLGFPEWYDAGKVVVEKNNIDFPTLMVIQFYLMGWAETKRWYDFKNPGSQADGSFLGFTEEFKGLENGYPGGRFFDPMGLSRGDAAKYQEYKQKEVKNGRLAMIACLGFAAQYAATGKGPLDNLADHLADPNHVNFATNGVSIPIA	26	241
FLVB	Cre16.g691800.t1.1	thylakoid flavodiiron protein	MQLLNRQAGRQTARNAAASKRAARAPARASRSAAVHVRA	MQLLNRQAGRQTARNAAASKRAARAPARASRSAAVHVRAVAAPVAPTTTTTGDDMPYRMSDVVMWSESKRIQTQVLPVAEDTITIRSLDWDRDRFDIEFGLENGTTYNAYLIYGADKTALVDASHEKFHNLFLEALQKELQAAGRSLDYVFVSHTEPDHSGLIPAVLDLYPEATVCGSKVCISFLQNLTHREQPFDADVKVLMPHYRFYYDCLMKPNAKSVTTALRKVKDLPYTMIANGHGPILRYNVSELVGDYGRWSAALTKGATSVAVLYASDYGFSDRLSQTLAKGITKARAPDIPGQEEIVAAVGRSSGIVLMSPPRDNADARTSLAAVSSAIKAKTKVVIAESYGGRDEPVDVLAAQLQDALTAKESIARKKAAMSGEVAKALARLSSGLYVV…	39	539
Cre16.g696000	Cre16.g696000.t1.2	UDP-N-acetylglucosamine diphosphorylase / UDP-N-acetylglucosamine pyrophosphorylase // UTP--glucose-1-phosphate uridylyltransferase / UDP-glucose pyrophosphorylase	MWEEECKNMQASKKRSS	MWEEECKNMQASKKRSSPAMGAGAAASGHQHIFEDWRNKKLRPQQMIQLASDLADLAQWAGVGRHVPELRVDGPVKAWAEYGTAGKVHLLQAADALQFNFAEAARKQAEQLADNWLWQVTEALPSLSAEPLRTTAPNNAIASLKTRLTEAEAAVRAVFDAERTSQAAGLKGLVEPLSVARCARNLQVLKALAAEVGLNATMADPAVAAVRTTLSAPLSLEAAAPAVAAQKTAAADAVNSEADAAVAAERSARVAEIEAAAAKTYRRALVLQASSPTHWHMSSETPALHRLGLMSALLMQLACDSAAGTPEGDAAAAELADAVRKLMPQMRIKLSEDDAARRVMLLAALTPAPPAPPPAPKPEPEEGEEDEEGKEGEEGAEEGEKAEKEEVPPPPARPSP…	17	1455
LHCB4	Cre17.g720250.t1.2	Light-harvesting minor chlorophyll a/b binding protein of photosystem II	MVFKFPTPPGTQKKAGTTATKPAPKATTKKVATSTGTRSGGVGYRKY	MVFKFPTPPGTQKKAGTTATKPAPKATTKKVATSTGTRSGGVGYRKYQGDALWLPNTTRPEWLDGSLPGDRGFDPLGLSKPSEFVVIGVDENDQNAAKNNKGSVEAIVQATPDEVSSENRLAPYSEVFGLARFRECELIHGRWAMLACLGALVAEATTGVSWVEAGKVELDGASYAGLSLPFSITQLIWIEVILVGGAEFYRNSETNPEKRCYPGGVFDPLKLASEDEERAFRLKTAEIKHARLAMVSFFGYGVQALSTGEGALGSLAKFADGLNNGKGL	47	280
STA2	Cre17.g721500.t1.2	Granule-bound starch synthase I	MAVASTSRPSSARPIVINAASFGVKKTANQLLRELARGSARKSTSRSAVTGATGATC	MAVASTSRPSSARPIVINAASFGVKKTANQLLRELARGSARKSTSRSAVTGATGATCALDIVMVAAEVAPWSKTGGLGDVTGGLPIELVKRGHRVMTIAPRYDQYADAWDTSVVVDIMGEKVRYFHSIKKGVHRVWIDHPWFLAKVWGKTGSKLYGPRSGADYLDNHKRFALFCKAAIEAARVLPFGPGEDCVFVANDWHSALVPVLLKDEYQPKGQFTKAKSVLAIHNIAFQGRMWEEAFKDMKLPQAAFDKLAFSDGYAKVYTEATPMEEDEKPPLTGKTYKKINWLKGGIIAADKLVTVSPNYATEIAADAAGGVELDTVIRAKGIEGIVNGMDIEEWNPKTDKFLSVPYDQNSVYAGKAAAKEALQAELGLPVDPTAPLFAFIGRLEEQKGVDII…	57	708
PSAK	Cre17.g724300.t1.2	Photosystem I reaction center subunit K	MQALATRPSAIRPTKAARRSSVVVRA	MQALATRPSAIRPTKAARRSSVVVRADGFIGSSTNLIMVASTTATLAAARFGLAPTVKKNTTAGLKLVDSKNSAGVISNDPAGFTIVDVLAMGAAGHGLGVGIVLGLKGIGAL	26	113
Cre17.g727100	Cre17.g727100.t1.2		MSEPGAGPSDGQVVTRKIRLHKVMRPLDESSPSSQEQHMDRRLAEILPAIA	MSEPGAGPSDGQVVTRKIRLHKVMRPLDESSPSSQEQHMDRRLAEILPAIADLPVPGPSGAGGSPADARAVEMRRLRGTQQELAQMEAMELATLFDMSKPHPLDNAAPATPWKGELRPVPRKIVLSPYQYEMINYQRMLMRKNIWYYRDRMNVPRGPCPLHVVKEAWVSGIVDENTLFWGHGLYDWLPAKNIKLLLPMVRTPEVRFATWIKRTFSLKPSLNRIREQRKEHRDPQEASLQVELMR	51	244
PRPL19	Cre17.g734450.t1.2	Chloroplast ribosomal protein L19	MLASRSAVRPFVAGRRPTVACSAKLSLHTLRQDMARSQLKTNLPAVVVGDNVKVGLAVQEGNGKTRTQTL	MLASRSAVRPFVAGRRPTVACSAKLSLHTLRQDMARSQLKTNLPAVVVGDNVKVGLAVQEGNGKTRTQTLDGVIIAAHGADSSRTLTFRRVFQGVGVELVMPVHSPAVQQIEFVRRGRVRRAKLFYLRERVGKSARLKEVVGVRAADVAAGKQ	70	153
